# Supplementary material
Source: PubMed Central journal article supplement (PMC3890856)
Supplement: 1307784111_pnas.201307784SI.pdf [file 1307784111_pnas.201307784SI.pdf]

# Supporting Information

Howard et al. 10.1073/pnas.1307784111

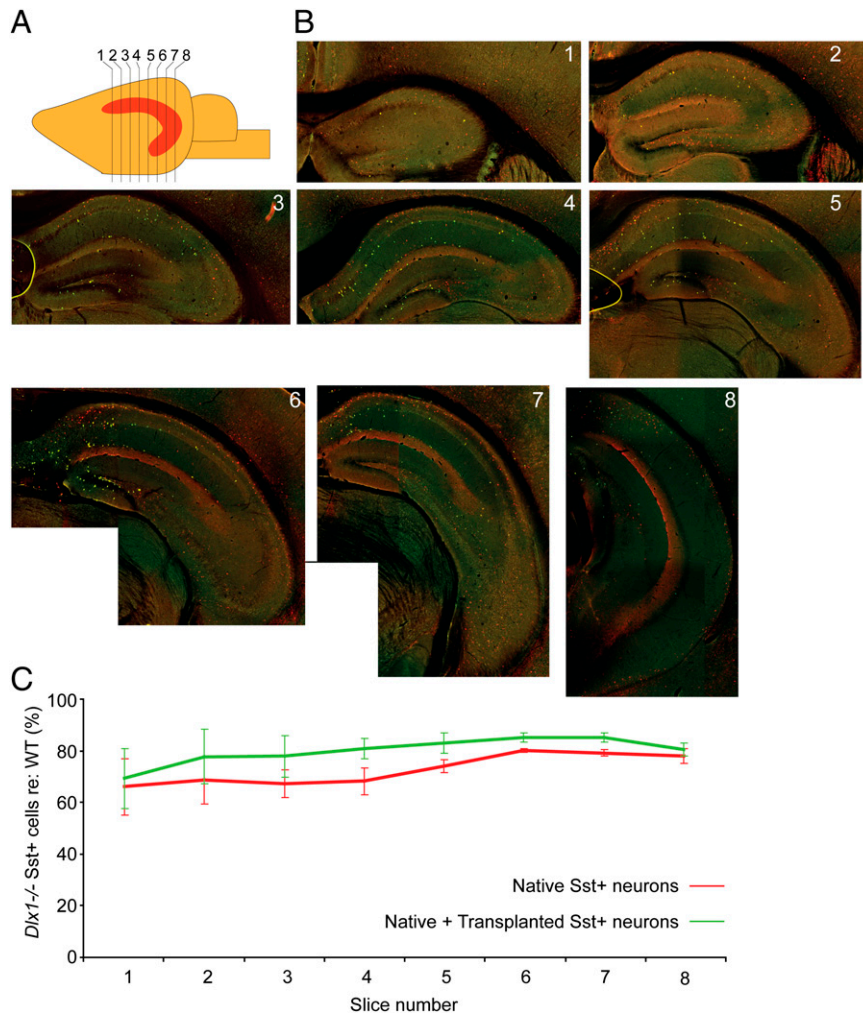

**Fig. S1.** Somatostatin-positive (Sst<sup>+</sup>) interneuron numbers in the WT, distal-less homeobox 1 (*Dlx1*<sup>-/-</sup>), and transplanted *Dlx1*<sup>-/-</sup> hippocampus. (A) Cartoon illustration of the postnatal day (P) 35 hippocampus and the orientation of sections. The numbered black lines indicate example sections through the hippocampus and correlate with the images below. (B) Representative coronal sections (50- $\mu$ m sections separated by 300  $\mu$ m) through the hippocampus of a P35 *Dlx1*<sup>-/-</sup> mouse transplanted at P2. Sections were stained with red fluorescent antibody to Sst and green fluorescent antibody to GFP to label transplanted interneurons. (C) Mean native (red) and total (native + transplanted; green) Sst<sup>+</sup> interneuron density across sections of *Dlx1*<sup>-/-</sup> hippocampi ( $n = 3$ ) normalized to WT Sst<sup>+</sup> numbers ( $n = 5$ ).

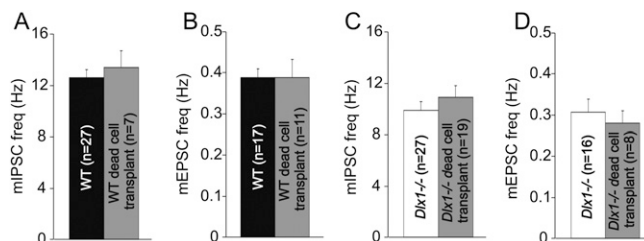

**Fig. S2.** Dead medial ganglionic eminence (MGE) cell transplantation does not alter inhibitory or excitatory synaptic transmission. Dead MGE cell transplantation (DCT) at P2 had no significant effect ( $P > 0.05$ ,  $t$  tests) on miniature inhibitory postsynaptic current (mIPSC) frequency in WT (A; WT =  $12.57 \pm 0.66$  Hz,  $n = 27$ ; WT DCT =  $13.34 \pm 1.28$  Hz,  $n = 7$ ) or *Dlx1*<sup>-/-</sup> (B; *Dlx1*<sup>-/-</sup> =  $9.86 \pm 0.71$  Hz,  $n = 27$ ; *Dlx1*<sup>-/-</sup> DCT =  $10.89 \pm 0.89$  Hz,  $n = 19$ ) mice or on miniature excitatory postsynaptic current (mEPSC) frequency in WT (C; WT =  $0.388 \pm 0.023$  Hz,  $n = 16$ ; WT DCT =  $0.388 \pm 0.046$  Hz,  $n = 11$ ) or *Dlx1*<sup>-/-</sup> (D; *Dlx1*<sup>-/-</sup> =  $0.307 \pm 0.030$  Hz,  $n = 17$ ; *Dlx1*<sup>-/-</sup> DCT =  $0.281 \pm 0.028$  Hz,  $n = 8$ ) mice.

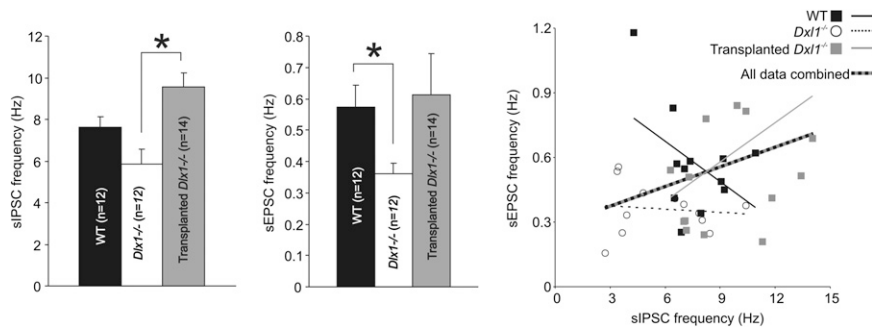

**Fig. 53.** Spontaneous inhibitory and excitatory synaptic event frequencies do not linearly correlate in individual neurons. Spontaneous inhibitory postsynaptic current (sIPSC) frequency (Left; WT =  $7.62 \pm 0.50$  Hz,  $n = 12$ ;  $Dlx1^{-/-}$  =  $5.85 \pm 0.72$  Hz,  $n = 12$ ; transplanted  $Dlx1^{-/-}$  =  $9.54 \pm 0.69$  Hz,  $n = 14$ ;  $*P < 0.001$ , one-way ANOVA) and spontaneous excitatory postsynaptic current (sEPSC) frequency (Center; WT =  $0.572 \pm 0.070$ ,  $n = 12$ ;  $Dlx1^{-/-}$  =  $0.361 \pm 0.033$  Hz,  $n = 12$ ; transplanted  $Dlx1^{-/-}$  =  $0.611 \pm 0.131$  Hz,  $n = 14$ ;  $*P < 0.05$ , one-way ANOVA) in WT,  $Dlx1^{-/-}$ , and MGE-transplanted  $Dlx1^{-/-}$  CA1 pyramidal neurons exhibit patterns similar to those shown by mIPSC and mEPSC data. (Right) Scatter plots of these two measures made in single neurons show no significant linear correlation between the two measures for any of the three groups ( $R^2$  values: WT = 0.21,  $Dlx1^{-/-}$  = 0.012, transplanted  $Dlx1^{-/-}$  = 0.10).

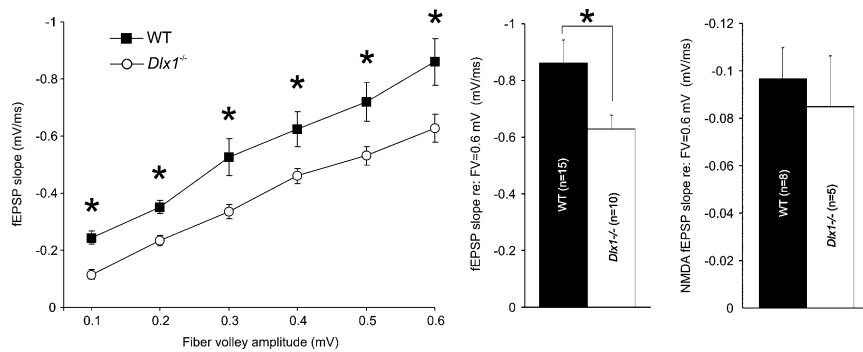

**Fig. 54.** Field potentials reveal decreased AMPA-mediated but normal NMDA-mediated synaptic transmission in  $Dlx1^{-/-}$  hippocampus. (Left) Input/output function of the field excitatory postsynaptic potential (fEPSP) slope plotted as a function of fiber volley (FV) amplitude reveals decreased synaptic responses in  $Dlx1^{-/-}$  slices relative to WT across a broad range of stimulus intensities (FV = 0.1: WT =  $0.243 \pm 0.023$  mV/ms,  $n = 20$ ;  $Dlx1^{-/-}$  =  $0.115 \pm 0.017$ ,  $n = 15$ ; FV = 0.2: WT =  $0.352 \pm 0.024$  mV/ms,  $n = 20$ ;  $Dlx1^{-/-}$  =  $0.233 \pm 0.018$ ,  $n = 15$ ; FV = 0.3: WT =  $0.527 \pm 0.064$  mV/ms,  $n = 20$ ;  $Dlx1^{-/-}$  =  $0.336 \pm 0.025$ ,  $n = 15$ ; FV = 0.4: WT =  $0.625 \pm 0.061$  mV/ms,  $n = 20$ ;  $Dlx1^{-/-}$  =  $0.46 \pm 0.026$ ,  $n = 15$ ; FV = 0.5: WT =  $0.721 \pm 0.068$  mV/ms,  $n = 20$ ;  $Dlx1^{-/-}$  =  $0.532 \pm 0.032$ ,  $n = 15$ ; FV = 0.6: WT =  $0.86 \pm 0.082$  mV/ms,  $n = 20$ ;  $Dlx1^{-/-}$  =  $0.628 \pm 0.051$ ,  $n = 15$ ;  $*P < 0.05$ ,  $t$  tests). At high stimulus levels (FV = 0.6 mV), the fEPSP slope was decreased (Center) but the isolated NMDA-mediated fEPSP slope was unchanged (Right) from WT (WT =  $0.097 \pm 0.013$  mV/ms,  $n = 8$ ;  $Dlx1^{-/-}$  =  $0.085 \pm 0.021$ ,  $n = 5$ ;  $*P > 0.05$ ,  $t$  tests).

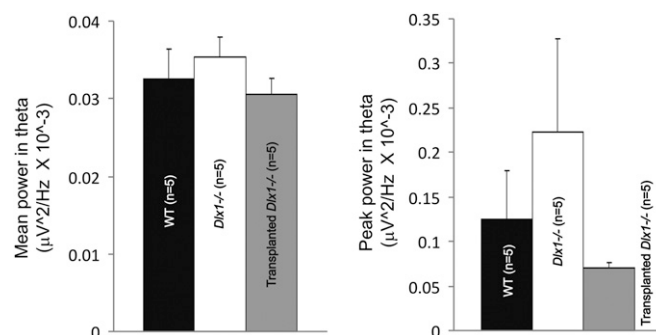

**Fig. 55.** Data for theta oscillations in local field potential recordings. Mean power (Left; WT =  $0.0306 \pm 0.00206$ ,  $n = 5$ ;  $Dlx1^{-/-}$  =  $0.0353 \pm 0.00261$ ,  $n = 5$ ; transplanted  $Dlx1^{-/-}$  =  $0.0326 \pm 0.0085$  Hz,  $n = 5$ ;  $P > 0.05$ , one-way ANOVA) and peak power (Right; WT =  $0.125 \pm 0.054$ ,  $n = 5$ ;  $Dlx1^{-/-}$  =  $0.223 \pm 0.104$ ,  $n = 5$ ; transplanted  $Dlx1^{-/-}$  =  $0.071 \pm 0.0062$  Hz,  $n = 5$ ;  $P > 0.05$ , one-way ANOVA) in the theta frequency band over the same 5-min epoch illustrated in Fig. 6B.
